# Supplementary material for: Social Transmission of Fear in Rats: The Role of 22-kHz Ultrasonic Distress Vocalization
Source: PLoS One. 2010 Dec 1;5(12):e15077. doi: 10.1371/journal.pone.0015077 (PMC2995742; doi:10.1371/journal.pone.0015077)
Supplement: Text S1 — Supporting Text. (DOC) [file pone.0015077.s005.doc]

**Supporting text**

**Text S1**

Supporting figure 1*A* shows the mean percentage freezing (SEM) displayed by SFC rats that were partnered with RN, RFE , RMGN(LS)-FE, or RMGN(LI)-FE rats during tone fear conditioning on day 1. There were no reliable differences among SFC groups during the baseline (*F*3, 30 = 2.156, *P* = .116) and 10 CS and ITI periods (*F*3, 30 = 2.541, *Ps* > .05).

Supporting figure 1*B* shows the mean percentage USV displayed by SFC rats during tone fear conditioning on day 1. There were no significant differences among the four sender groups during 10 CS and ITI periods (*F*3, 30 = .587, *P* = .629).

Supporting figure 1*C* presents the mean percentage freezing displayed by RFE (paired with either SFC or SN), RMGN(LS)-FE (paired with SFC), and RMGN(LI)-FE (paired with SFC) rats during 3 unsignaled footshocks on day 1. No group differences were observed during the 3 min baseline (*F*3, 30 = .569, *P* = .641) and 3 ITI periods (*F*3, 30 = .430, *P* = .733).

Supporting figure 1*D* shows the mean percentage USV displayed by RFE groups as in Fig. S1*C*. The levels of USV during 3 ITI periods were comparable in the four receiver groups (*F*3, 30 = .715, *P* = .552).

Supporting figure 2 displays the mean percentage freezing levels of SFC and RN animals that were pair-housed for either 1 or 3 weeks prior to the experiment. The duration of pair-housing had no effect on freezing for both SFC and RN rats during pair-testing on day 2 (both *P’*s *>* .3, by independent *t*-test).

Supporting figure 3 represents the mean percentage freezing (Fig. S3*A*) and USV (Fig. S3*B*) displayed by SFC rats with intra-MGN lidocaine (on day 3) and without the drug (on day 4) during the first 3-min period of the tone testing. Despite re-testing, which may result in extinction, the SFC rats froze more (*P* < .05, by one sample *t*-test) and tended to emit USVs more (*P* = .089, by one sample *t*-test) when they were in drug-free state (on day 4) than when they were injected with lidocain in their MGN (on day 3).

Supporting figure 4*A* shows individual (RFE) rat’s time course of USV emission during the unsignaled shock episode and their subsequent level of freezing during the pair-testing (SFC-RFE). Four RFE rats received footshocks while emitting USVs (‘paired’ USV-footshock experience), while the other four rats received footshocks prior to emitting USVs (‘unpaired’ USV-footshock experience).

Supporting figure 4B depicts freezing displayed by ‘paired’ and ‘unpaired’ RFE rats during the (SFC-RFE) pair-testing. The USV-footshock ‘paired’ rats froze significantly more than the USV-footshock ‘unpaired’ rats in reaction to USVs emitted by their partner SFC rats (*P* < .01, by independent *t*-test).
